# Supplementary material for: Comparative analysis of primary versus relapse/refractory DLBCL identifies shifts in mutation spectrum
Source: PubMed Central journal article supplement (PMC5725088; doi:10.18632/oncotarget.18502), 2017-06-15
Supplement: oncotarget-08-99237-s001.pdf [file oncotarget-08-99237-s001.pdf]

## **Comparative analysis of primary *versus* relapse/refractory DLBCL identifies shifts in mutation spectrum**

### **SUPPLEMENTARY MATERIALS**

**For Supplementary Tables see in Supplementary Files.**
